# Supplementary material
Source: MDPI journal article supplement (https://www.mdpi.com/2072-4292/16/5/889)
Supplement: s1 [file s1]

**Table S1.** Distribution of MODIS data.

| Year<br>Month | 201<br>0 | 201<br>1 | 201<br>2 | 201<br>3 | 201<br>4 | 201<br>5 | 201<br>6 | 201<br>7 | 201<br>8 | 201<br>9 | 202<br>0 | 202<br>1 | 202<br>2 | Total |
|---------------|----------|----------|----------|----------|----------|----------|----------|----------|----------|----------|----------|----------|----------|-------|
| 1             | 4        | 13       | 4        | 7        | 6        | 5        | 1        | 4        | 2        | 1        | 1        | 8        | 4        | 60    |
| 2             | 2        | 0        | 2        | 0        | 0        | 4        | 8        | 4        | 2        | 0        | 7        | 6        | 1        | 36    |
| 3             | 6        | 1        | 4        | 5        | 9        | 1        | 3        | 5        | 1        | 3        | 7        | 3        | 8        | 56    |
| 4             | 3        | 7        | 9        | 4        | 6        | 2        | 5        | 6        | 7        | 4        | 8        | 5        | 1        | 67    |
| 5             | 6        | 3        | 5        | 5        | 5        | 3        | 2        | 5        | 6        | 9        | 4        | 3        | 4        | 60    |
| 6             | 1        | 1        | 1        | 1        | 1        | 2        | 3        | 3        | 5        | 4        | 2        | 2        | 7        | 33    |
| 7             | 1        | 2        | 3        | 3        | 2        | 3        | 2        | 3        | 7        | 1        | 1        | 3        | 2        | 33    |
| 8             | 3        | 1        | 4        | 4        | 1        | 2        | 1        | 5        | 4        | 8        | 5        | 4        | 4        | 46    |
| 9             | 4        | 1        | 5        | 2        | 1        | 4        | 1        | 3        | 1        | 4        | 4        | 8        | 2        | 40    |
| 10            | 3        | 2        | 9        | 8        | 9        | 7        | 0        | 3        | 5        | 5        | 6        | 7        | 6        | 70    |
| 11            | 9        | 2        | 7        | 7        | 5        | 1        | 7        | 3        | 6        | 9        | 7        | 6        | 1        | 70    |
| 12            | 16       | 14       | 7        | 9        | 9        | 4        | 12       | 5        | 3        | 7        | 8        | 17       | 11       | 122   |
| Total         | 58       | 47       | 60       | 55       | 54       | 38       | 45       | 49       | 49       | 55       | 60       | 72       | 51       | 693   |
